# Supplementary material for: Histomorphometric Analysis of Differential Regional Bone Regeneration Induced by Distinct Doped Membranes
Source: MDPI journal article supplement (doi:10.3390/polym14102078), 2022-05-19
Supplement: s1 [file s1]

## Supplementary Information

### **Histomorphometric analysis of differential regional bone regeneration induced by distinct doped membranes.**

Manuel Toledano <sup>1</sup>, Cristina Vallecillo <sup>1</sup>, Aida Gutierrez-Corrales <sup>2</sup>, Daniel Torres-Lagares <sup>2</sup>,

Manuel Toledano-Osorio <sup>1\*</sup>, María-Angeles Serrera-Figallo <sup>2</sup>

<sup>1</sup> Faculty of Dentistry, Colegio Máximo de Cartuja s/n, University of Granada, 18071 Granada, Spain; toledano@ugr.es (M.T.); cvallecillorivas@hotmail.com (C.V.)

<sup>2</sup> Faculty of Dentistry, Oral Surgery Section, University of Sevilla, Avicena s/n, 41009 Sevilla, Spain; agcorrales@us.es (A.G.-C.); daniel@us.es (D.T.-L.); maserrera@us.es (M.-A.S.-F.)

\* Correspondence: mtoledano@ugr.es; Tel.: +34-958-243-789

Table of content:

**Table S1:** Data from histomorphometric study of the new bone area, osteoid area, and soft tissue area fractions when lateral and central areas of the defect were compared.

**Table S2:** Data from histomorphometric study of the new bone area, osteoid area, and soft tissue area fractions when top and bottom areas of the defect were compared.

**Table S3:** Data from histomorphometric study of the new bone area, osteoid area, and soft tissue area fractions at each of the six regions of the grid, comparing the four groups of study

**Table S4:** Data from histomorphometric study of the new bone area, osteoid area, and soft tissue area fractions at each of the six regions of the grid.

**Table S1:** Data from histomorphometric study of the new bone area, osteoid area, and soft tissue area fractions when lateral and central areas of the defect were compared.

|     |                      |             | Means   | SD       | SE      | LL      | UP      | Min | Max    |
|-----|----------------------|-------------|---------|----------|---------|---------|---------|-----|--------|
| NBA | HOOC-Si-Membrane     | Central     | 26.8970 | 27.91951 | 4.11651 | 18.6059 | 35.1880 | .00 | 100.00 |
|     |                      | Pheripheral | 49.3903 | 21.58217 | 2.25010 | 44.9208 | 53.8599 | .55 | 113.13 |
|     | Zn-HOOC-Si-Membrane  | Central     | 29.3129 | 34.21854 | 4.93902 | 19.3769 | 39.2489 | .00 | 99.02  |
|     |                      | Pheripheral | 54.4649 | 26.95327 | 2.75091 | 49.0037 | 59.9261 | .00 | 120.15 |
|     | Dox-HOOC-Si-Membrane | Central     | 9.7317  | 16.04759 | 2.31627 | 5.0719  | 14.3914 | .00 | 54.72  |
|     |                      | Pheripheral | 40.7239 | 22.44788 | 2.29108 | 36.1755 | 45.2722 | .00 | 100.08 |
|     | Sham                 | Central     | 10.4680 | 21.51848 | 3.17273 | 4.0778  | 16.8582 | .00 | 81.27  |
|     |                      | Pheripheral | 31.5384 | 22.41311 | 2.33673 | 26.8967 | 36.1800 | .00 | 90.38  |
| OA  | HOOC-Si-Membrane     | Central     | 2.1124  | 3.09393  | .45618  | 1.1936  | 3.0312  | .00 | 14.51  |
|     |                      | Pheripheral | 3.5452  | 7.07076  | .73718  | 2.0809  | 5.0095  | .00 | 61.75  |
|     | Zn-HOOC-Si-Membrane  | Central     | 2.7106  | 6.28837  | .90765  | .8847   | 4.5366  | .00 | 32.74  |
|     |                      | Pheripheral | 1.7495  | 2.37767  | .24267  | 1.2677  | 2.2312  | .00 | 15.65  |
|     | Dox-HOOC-Si-Membrane | Central     | .7290   | 2.17276  | .31361  | .0981   | 1.3599  | .00 | 13.14  |
|     |                      | Pheripheral | 1.5727  | 1.71730  | .17527  | 1.2248  | 1.9207  | .00 | 8.05   |
|     | Sham                 | Central     | 1.6786  | 3.15008  | .47489  | .7209   | 2.6363  | .00 | 12.96  |
|     |                      | Pheripheral | 2.4049  | 3.43193  | .35780  | 1.6942  | 3.1156  | .00 | 27.06  |
| STA | HOOC-Si-Membrane     | Central     | 63.6120 | 32.56648 | 4.80166 | 53.9409 | 73.2830 | .00 | 100.00 |
|     |                      | Pheripheral | 45.9774 | 20.16438 | 2.10228 | 41.8015 | 50.1533 | .00 | 89.11  |
|     | Zn-HOOC-Si-Membrane  | Central     | 58.1812 | 38.88540 | 5.61262 | 46.8901 | 69.4724 | .00 | 100.00 |
|     |                      | Pheripheral | 42.2261 | 25.06372 | 2.55805 | 37.1478 | 47.3045 | .00 | 100.00 |
|     | Dox-HOOC-Si-Membrane | Central     | 68.6729 | 38.93682 | 5.62005 | 57.3668 | 79.9790 | .00 | 100.00 |
|     |                      | Pheripheral | 55.0939 | 23.11064 | 2.35872 | 50.4112 | 59.7765 | .00 | 100.00 |
|     | Sham                 | Central     | 73.7759 | 37.31295 | 5.62514 | 62.4317 | 85.1201 | .00 | 100.00 |
|     |                      | Pheripheral | 61.1643 | 22.46363 | 2.34200 | 56.5123 | 65.8164 | .00 | 100.00 |

SD: Standard Deviation; SE: Standard Error; LL: Lower Limit; UP: Upper Limit; Min: Minimum; Max: Maximum; NBA: New Bone Area; OA: Osteoid Area; STA: Soft Tissue Area.

**Table S2:** Data from histomorphometric study of the new bone area, osteoid area, and soft tissue area fractions when top and bottom areas of the defect were compared.

|     |                      |        | Means   | SD       | SE      | LL      | UP      | Min | Max    |
|-----|----------------------|--------|---------|----------|---------|---------|---------|-----|--------|
| NBA | HOOC-Si-Membrane     | Top    | 44.0687 | 26.92393 | 3.24126 | 37.6009 | 50.5365 | .00 | 113.13 |
|     |                      | Bottom | 39.7164 | 25.15646 | 3.02848 | 33.6731 | 45.7596 | .00 | 100.00 |
|     | Zn-HOOC-Si-Membrane  | Top    | 51.1442 | 30.65623 | 3.61287 | 43.9403 | 58.3480 | .00 | 117.09 |
|     |                      | Bottom | 41.0176 | 32.25652 | 3.80147 | 33.4377 | 48.5975 | .00 | 120.15 |
|     | Dox-HOOC-Si-Membrane | Top    | 24.3776 | 21.91464 | 2.58267 | 19.2280 | 29.5273 | .00 | 100.08 |
|     |                      | Bottom | 36.4086 | 26.90692 | 3.17101 | 30.0858 | 42.7314 | .00 | 89.06  |
|     | Sham                 | Top    | 22.4130 | 21.09944 | 2.54007 | 17.3444 | 27.4817 | .00 | 78.75  |
|     |                      | Bottom | 26.6168 | 26.92120 | 3.24093 | 20.1496 | 33.0840 | .00 | 90.38  |
| OA  | HOOC-Si-Membrane     | Top    | 3.6094  | 7.85056  | .94510  | 1.7235  | 5.4953  | .00 | 61.75  |
|     |                      | Bottom | 2.5258  | 3.45536  | .41598  | 1.6957  | 3.3559  | .00 | 15.60  |
|     | Zn-HOOC-Si-Membrane  | Top    | 1.9242  | 3.40952  | .40182  | 1.1230  | 2.7254  | .00 | 25.62  |
|     |                      | Bottom | 2.2156  | 4.74231  | .55889  | 1.1012  | 3.3299  | .00 | 32.74  |
|     | Dox-HOOC-Si-Membrane | Top    | 1.1622  | 1.49749  | .17648  | .8103   | 1.5141  | .00 | 5.59   |
|     |                      | Bottom | 1.4207  | 2.26177  | .26655  | .8892   | 1.9522  | .00 | 13.14  |
|     | Sham                 | Top    | 2.1182  | 2.49897  | .30530  | 1.5087  | 2.7278  | .00 | 10.59  |
|     |                      | Bottom | 2.2201  | 4.02508  | .48456  | 1.2532  | 3.1871  | .00 | 27.06  |
| STA | HOOC-Si-Membrane     | Top    | 50.6496 | 25.71327 | 3.09551 | 44.4726 | 56.8266 | .00 | 100.00 |
|     |                      | Bottom | 53.0616 | 26.87195 | 3.23500 | 46.6062 | 59.5169 | .00 | 100.00 |
|     | Zn-HOOC-Si-Membrane  | Top    | 44.1233 | 29.63989 | 3.49309 | 37.1583 | 51.0884 | .00 | 100.00 |
|     |                      | Bottom | 50.9657 | 32.46473 | 3.82600 | 43.3369 | 58.5945 | .00 | 100.00 |
|     | Dox-HOOC-Si-Membrane | Top    | 73.0385 | 23.59752 | 2.78099 | 67.4933 | 78.5836 | .00 | 100.00 |
|     |                      | Bottom | 46.2019 | 29.65358 | 3.49471 | 39.2337 | 53.1702 | .00 | 100.00 |
|     | Sham                 | Top    | 69.4299 | 25.01630 | 3.05623 | 63.3279 | 75.5318 | .00 | 100.00 |
|     |                      | Bottom | 61.1806 | 31.36690 | 3.77613 | 53.6454 | 68.7157 | .00 | 100.00 |

SD: Standard Deviation; SE: Standard Error; LL: Lower Limit; UP: Upper Limit; Min: Minimum; Max: Maximum; NBA: New Bone Area; OA: Osteoid Area; STA: Soft Tissue Area.

**Table S3:** Data from histomorphometric study of the new bone area, osteoid area, and soft tissue area fractions at each of the six regions of the grid, comparing the four groups of study

|     |                      | Means   | SD       | SE      | LL      | UP      | Min   | Max    |
|-----|----------------------|---------|----------|---------|---------|---------|-------|--------|
| R1  |                      |         |          |         |         |         |       |        |
| NBA | HOOC-Si-Membrane     | 50.2135 | 27.98468 | 5.83521 | 38.1120 | 62.3150 | 8.74  | 113.13 |
|     | Zn-HOOC-Si-Membrane  | 65.6671 | 27.92642 | 5.70046 | 53.8748 | 77.4594 | .00   | 117.09 |
|     | Dox-HOOC-Si-Membrane | 32.9833 | 23.66917 | 4.83145 | 22.9887 | 42.9779 | 1.39  | 100.08 |
|     | Sham                 | 27.7887 | 20.46795 | 4.26786 | 18.9377 | 36.6397 | .00   | 78.75  |
| OA  | HOOC-Si-Membrane     | 1.5704  | 1.87759  | .39150  | .7585   | 2.3824  | .00   | 7.14   |
|     | Zn-HOOC-Si-Membrane  | 1.1988  | 1.31330  | .26808  | .6442   | 1.7533  | .00   | 4.46   |
|     | Dox-HOOC-Si-Membrane | 1.8454  | 1.59295  | .32516  | 1.1728  | 2.5181  | .00   | 5.59   |
|     | Sham                 | 3.0274  | 2.99688  | .62489  | 1.7314  | 4.3233  | .00   | 10.59  |
| STA | HOOC-Si-Membrane     | 45.7939 | 24.90019 | 5.19205 | 35.0263 | 56.5616 | .00   | 89.11  |
|     | Zn-HOOC-Si-Membrane  | 35.0492 | 25.59266 | 5.22408 | 24.2423 | 45.8560 | .00   | 100.00 |
|     | Dox-HOOC-Si-Membrane | 65.0717 | 23.26270 | 4.74848 | 55.2487 | 74.8946 | .00   | 98.61  |
|     | Sham                 | 66.6713 | 21.24426 | 4.42973 | 57.4846 | 75.8580 | 20.60 | 100.00 |
| R2  |                      |         |          |         |         |         |       |        |
| NBA | HOOC-Si-Membrane     | 38.4700 | 30.24636 | 6.30680 | 25.3905 | 51.5495 | .00   | 100.00 |
|     | Zn-HOOC-Si-Membrane  | 47.7871 | 34.92616 | 7.12927 | 33.0391 | 62.5351 | .00   | 99.02  |
|     | Dox-HOOC-Si-Membrane | 8.7225  | 15.51915 | 3.16783 | 2.1693  | 15.2757 | .00   | 54.72  |
|     | Sham                 | 12.9296 | 21.05526 | 4.39032 | 3.8246  | 22.0345 | .00   | 71.42  |
| OA  | HOOC-Si-Membrane     | 2.4352  | 2.88983  | .60257  | 1.1856  | 3.6849  | .00   | 11.65  |
|     | Zn-HOOC-Si-Membrane  | 2.7513  | 5.44616  | 1.11169 | .4515   | 5.0510  | .00   | 25.62  |
|     | Dox-HOOC-Si-Membrane | .3883   | 1.06816  | .21804  | -.0627  | .8394   | .00   | 4.65   |
|     | Sham                 | 1.3010  | 2.37498  | .51826  | .2199   | 2.3820  | .00   | 8.62   |
| STA | HOOC-Si-Membrane     | 57.3948 | 29.56988 | 6.16575 | 44.6078 | 70.1818 | .00   | 100.00 |
|     | Zn-HOOC-Si-Membrane  | 46.5375 | 34.33499 | 7.00860 | 32.0391 | 61.0359 | .11   | 100.00 |
|     | Dox-HOOC-Si-Membrane | 86.7229 | 24.15964 | 4.93157 | 76.5212 | 96.9246 | .00   | 100.00 |
|     | Sham                 | 80.0143 | 29.29796 | 6.39334 | 66.6780 | 93.3506 | .00   | 100.00 |
| R3  |                      |         |          |         |         |         |       |        |
| NBA | HOOC-Si-Membrane     | 43.5226 | 21.68071 | 4.52074 | 34.1472 | 52.8981 | .55   | 97.57  |
|     | Zn-HOOC-Si-Membrane  | 39.9783 | 23.22653 | 4.74110 | 30.1706 | 49.7860 | 13.57 | 100.00 |
|     | Dox-HOOC-Si-Membrane | 31.4271 | 17.22120 | 3.51526 | 24.1552 | 38.6990 | .00   | 70.62  |
|     | Sham                 | 26.5209 | 19.28451 | 4.02110 | 18.1816 | 34.8601 | .00   | 73.50  |
| OA  | HOOC-Si-Membrane     | 6.8226  | 12.72943 | 2.65427 | 1.3180  | 12.3272 | .72   | 61.75  |
|     | Zn-HOOC-Si-Membrane  | 1.8225  | 1.79615  | .36664  | 1.0641  | 2.5809  | .00   | 7.21   |
|     | Dox-HOOC-Si-Membrane | 1.2529  | 1.45719  | .29745  | .6376   | 1.8682  | .00   | 4.37   |
|     | Sham                 | 1.9552  | 1.75953  | .36689  | 1.1943  | 2.7161  | .00   | 6.67   |
| STA | HOOC-Si-Membrane     | 48.7600 | 21.75498 | 4.53623 | 39.3524 | 58.1676 | .00   | 85.41  |
|     | Zn-HOOC-Si-Membrane  | 50.7833 | 27.19926 | 5.55203 | 39.2981 | 62.2686 | .00   | 86.43  |
|     | Dox-HOOC-Si-Membrane | 67.3208 | 17.27310 | 3.52586 | 60.0270 | 74.6146 | 26.24 | 100.00 |
|     | Sham                 | 62.5243 | 21.93273 | 4.57329 | 53.0399 | 72.0088 | .00   | 93.35  |
| R4  |                      |         |          |         |         |         |       |        |

|     |                      |         |          |         |         |         |       |        |
|-----|----------------------|---------|----------|---------|---------|---------|-------|--------|
| NBA | HOOC-Si-Membrane     | 55.3535 | 18.72655 | 3.90476 | 47.2555 | 63.4514 | 25.61 | 100.00 |
|     | Zn-HOOC-Si-Membrane  | 64.9108 | 25.54806 | 5.21498 | 54.1228 | 75.6988 | 21.12 | 120.15 |
|     | Dox-HOOC-Si-Membrane | 45.1658 | 23.20595 | 4.73689 | 35.3668 | 54.9648 | .00   | 81.26  |
|     | Sham                 | 33.3322 | 22.73136 | 4.73982 | 23.5024 | 43.1619 | 2.85  | 89.54  |
| OA  | HOOC-Si-Membrane     | 1.9800  | 2.30973  | .48161  | .9812   | 2.9788  | .00   | 9.49   |
|     | Zn-HOOC-Si-Membrane  | 1.4079  | 2.08255  | .42510  | .5285   | 2.2873  | .00   | 8.83   |
|     | Dox-HOOC-Si-Membrane | 1.7571  | 1.86676  | .38105  | .9688   | 2.5453  | .00   | 5.53   |
|     | Sham                 | 1.8113  | 2.12764  | .44364  | .8912   | 2.7314  | .00   | 6.90   |
| STA | HOOC-Si-Membrane     | 41.6352 | 17.77971 | 3.70733 | 33.9467 | 49.3237 | .00   | 73.50  |
|     | Zn-HOOC-Si-Membrane  | 34.9158 | 23.63496 | 4.82447 | 24.9357 | 44.8960 | 1.80  | 78.88  |
|     | Dox-HOOC-Si-Membrane | 47.3167 | 22.00996 | 4.49277 | 38.0227 | 56.6107 | .00   | 100.00 |
|     | Sham                 | 59.1565 | 22.98074 | 4.79182 | 49.2189 | 69.0941 | 9.04  | 94.02  |
| R5  |                      |         |          |         |         |         |       |        |
| NBA | HOOC-Si-Membrane     | 15.3239 | 19.98853 | 4.16790 | 6.6802  | 23.9676 | .00   | 60.60  |
|     | Zn-HOOC-Si-Membrane  | 10.8388 | 21.46208 | 4.38093 | 1.7761  | 19.9014 | .00   | 78.27  |
|     | Dox-HOOC-Si-Membrane | 10.7408 | 16.83086 | 3.43559 | 3.6338  | 17.8479 | .00   | 54.16  |
|     | Sham                 | 8.0065  | 22.16179 | 4.62105 | -1.5770 | 17.5900 | .00   | 81.27  |
| OA  | HOOC-Si-Membrane     | 1.7896  | 3.31827  | .69191  | .3546   | 3.2245  | .00   | 14.51  |
|     | Zn-HOOC-Si-Membrane  | 2.6700  | 7.15139  | 1.45977 | -.3498  | 5.6898  | .00   | 32.74  |
|     | Dox-HOOC-Si-Membrane | 1.0696  | 2.87470  | .58680  | -.1443  | 2.2835  | .00   | 13.14  |
|     | Sham                 | 2.0235  | 3.74256  | .78038  | .4051   | 3.6419  | .00   | 12.96  |
| STA | HOOC-Si-Membrane     | 69.8291 | 34.84481 | 7.26564 | 54.7611 | 84.8972 | .00   | 100.00 |
|     | Zn-HOOC-Si-Membrane  | 69.8250 | 40.34918 | 8.23624 | 52.7870 | 86.8630 | .00   | 100.00 |
|     | Dox-HOOC-Si-Membrane | 50.6229 | 42.83042 | 8.74272 | 32.5372 | 68.7086 | .00   | 100.00 |
|     | Sham                 | 68.0800 | 43.24147 | 9.01647 | 49.3810 | 86.7790 | .00   | 100.00 |
| R6  |                      |         |          |         |         |         |       |        |
| NBA | HOOC-Si-Membrane     | 48.4717 | 15.74919 | 3.28393 | 41.6613 | 55.2822 | 21.36 | 75.47  |
|     | Zn-HOOC-Si-Membrane  | 47.3033 | 22.61202 | 4.61566 | 37.7551 | 56.8516 | .97   | 85.41  |
|     | Dox-HOOC-Si-Membrane | 53.3192 | 18.63343 | 3.80353 | 45.4510 | 61.1874 | 21.25 | 89.06  |
|     | Sham                 | 38.5117 | 25.98322 | 5.41788 | 27.2758 | 49.7477 | 1.91  | 90.38  |
| OA  | HOOC-Si-Membrane     | 3.8078  | 4.23813  | .88371  | 1.9751  | 5.6405  | .00   | 15.60  |
|     | Zn-HOOC-Si-Membrane  | 2.5688  | 3.59423  | .73367  | 1.0510  | 4.0865  | .00   | 15.65  |
|     | Dox-HOOC-Si-Membrane | 1.4354  | 1.94832  | .39770  | .6127   | 2.2581  | .00   | 8.05   |
|     | Sham                 | 2.8257  | 5.56278  | 1.15992 | .4201   | 5.2312  | .00   | 27.06  |
| STA | HOOC-Si-Membrane     | 47.7204 | 15.53770 | 3.23983 | 41.0014 | 54.4394 | 17.02 | 77.99  |
|     | Zn-HOOC-Si-Membrane  | 48.1563 | 20.46178 | 4.17674 | 39.5160 | 56.7965 | 14.03 | 98.42  |
|     | Dox-HOOC-Si-Membrane | 40.6663 | 18.49097 | 3.77445 | 32.8582 | 48.4743 | 8.74  | 77.44  |
|     | Sham                 | 56.3052 | 23.75404 | 4.95306 | 46.0332 | 66.5772 | 9.62  | 95.91  |

SD: Standard Deviation; SE: Standard Error; LL: Lower Limit; UP: Upper Limit; Min: Minimum; Max: Maximum; NBA: New Bone Area; OA: Osteoid Area; STA: Soft Tissue Area.

**Table S4:** Data from histomorphometric study of the new bone area, osteoid area, and soft tissue area fractions at each of the six regions of the grid.

|                      |    | Means   | SD       | SE      | LL      | UP      | Min   | Max    |
|----------------------|----|---------|----------|---------|---------|---------|-------|--------|
| HOOC-Si-Membrane     |    |         |          |         |         |         |       |        |
| NBA                  | R1 | 50.2135 | 27.98468 | 5.83521 | 38.1120 | 62.3150 | 8.74  | 113.13 |
|                      | R2 | 38.4700 | 30.24636 | 6.30680 | 25.3905 | 51.5495 | .00   | 100.00 |
|                      | R3 | 43.5226 | 21.68071 | 4.52074 | 34.1472 | 52.8981 | .55   | 97.57  |
|                      | R4 | 55.3535 | 18.72655 | 3.90476 | 47.2555 | 63.4514 | 25.61 | 100.00 |
|                      | R5 | 15.3239 | 19.98853 | 4.16790 | 6.6802  | 23.9676 | .00   | 60.60  |
|                      | R6 | 48.4717 | 15.74919 | 3.28393 | 41.6613 | 55.2822 | 21.36 | 75.47  |
| OA                   | R1 | 1.5704  | 1.87759  | .39150  | .7585   | 2.3824  | .00   | 7.14   |
|                      | R2 | 2.4352  | 2.88983  | .60257  | 1.1856  | 3.6849  | .00   | 11.65  |
|                      | R3 | 6.8226  | 12.72943 | 2.65427 | 1.3180  | 12.3272 | .72   | 61.75  |
|                      | R4 | 1.9800  | 2.30973  | .48161  | .9812   | 2.9788  | .00   | 9.49   |
|                      | R5 | 1.7896  | 3.31827  | .69191  | .3546   | 3.2245  | .00   | 14.51  |
|                      | R6 | 3.8078  | 4.23813  | .88371  | 1.9751  | 5.6405  | .00   | 15.60  |
| STA                  | R1 | 45.7939 | 24.90019 | 5.19205 | 35.0263 | 56.5616 | .00   | 89.11  |
|                      | R2 | 57.3948 | 29.56988 | 6.16575 | 44.6078 | 70.1818 | .00   | 100.00 |
|                      | R3 | 48.7600 | 21.75498 | 4.53623 | 39.3524 | 58.1676 | .00   | 85.41  |
|                      | R4 | 41.6352 | 17.77971 | 3.70733 | 33.9467 | 49.3237 | .00   | 73.50  |
|                      | R5 | 69.8291 | 34.84481 | 7.26564 | 54.7611 | 84.8972 | .00   | 100.00 |
|                      | R6 | 47.7204 | 15.53770 | 3.23983 | 41.0014 | 54.4394 | 17.02 | 77.99  |
| Zn-HOOC-Si-Membrane  |    |         |          |         |         |         |       |        |
| NBA                  | R1 | 65.6671 | 27.92642 | 5.70046 | 53.8748 | 77.4594 | .00   | 117.09 |
|                      | R2 | 47.7871 | 34.92616 | 7.12927 | 33.0391 | 62.5351 | .00   | 99.02  |
|                      | R3 | 39.9783 | 23.22653 | 4.74110 | 30.1706 | 49.7860 | 13.57 | 100.00 |
|                      | R4 | 64.9108 | 25.54806 | 5.21498 | 54.1228 | 75.6988 | 21.12 | 120.15 |
|                      | R5 | 10.8388 | 21.46208 | 4.38093 | 1.7761  | 19.9014 | .00   | 78.27  |
|                      | R6 | 47.3033 | 22.61202 | 4.61566 | 37.7551 | 56.8516 | .97   | 85.41  |
| OA                   | R1 | 1.1988  | 1.31330  | .26808  | .6442   | 1.7533  | .00   | 4.46   |
|                      | R2 | 2.7513  | 5.44616  | 1.11169 | .4515   | 5.0510  | .00   | 25.62  |
|                      | R3 | 1.8225  | 1.79615  | .36664  | 1.0641  | 2.5809  | .00   | 7.21   |
|                      | R4 | 1.4079  | 2.08255  | .42510  | .5285   | 2.2873  | .00   | 8.83   |
|                      | R5 | 2.6700  | 7.15139  | 1.45977 | -.3498  | 5.6898  | .00   | 32.74  |
|                      | R6 | 2.5688  | 3.59423  | .73367  | 1.0510  | 4.0865  | .00   | 15.65  |
| STA                  | R1 | 35.0492 | 25.59266 | 5.22408 | 24.2423 | 45.8560 | .00   | 100.00 |
|                      | R2 | 46.5375 | 34.33499 | 7.00860 | 32.0391 | 61.0359 | .11   | 100.00 |
|                      | R3 | 50.7833 | 27.19926 | 5.55203 | 39.2981 | 62.2686 | .00   | 86.43  |
|                      | R4 | 34.9158 | 23.63496 | 4.82447 | 24.9357 | 44.8960 | 1.80  | 78.88  |
|                      | R5 | 69.8250 | 40.34918 | 8.23624 | 52.7870 | 86.8630 | .00   | 100.00 |
|                      | R6 | 48.1563 | 20.46178 | 4.17674 | 39.5160 | 56.7965 | 14.03 | 98.42  |
| Dox-HOOC-Si-Membrane |    |         |          |         |         |         |       |        |
| NBA                  | R1 | 32.9833 | 23.66917 | 4.83145 | 22.9887 | 42.9779 | 1.39  | 100.08 |
|                      | R2 | 8.7225  | 15.51915 | 3.16783 | 2.1693  | 15.2757 | .00   | 54.72  |
|                      | R3 | 31.4271 | 17.22120 | 3.51526 | 24.1552 | 38.6990 | .00   | 70.62  |
|                      | R4 | 45.1658 | 23.20595 | 4.73689 | 35.3668 | 54.9648 | .00   | 81.26  |
|                      | R5 | 10.7408 | 16.83086 | 3.43559 | 3.6338  | 17.8479 | .00   | 54.16  |
|                      | R6 | 53.3192 | 18.63343 | 3.80353 | 45.4510 | 61.1874 | 21.25 | 89.06  |

|      |    |         |          |         |         |         |       |        |
|------|----|---------|----------|---------|---------|---------|-------|--------|
| OA   | R1 | 1.8454  | 1.59295  | .32516  | 1.1728  | 2.5181  | .00   | 5.59   |
|      | R2 | .3883   | 1.06816  | .21804  | -.0627  | .8394   | .00   | 4.65   |
|      | R3 | 1.2529  | 1.45719  | .29745  | .6376   | 1.8682  | .00   | 4.37   |
|      | R4 | 1.7571  | 1.86676  | .38105  | .9688   | 2.5453  | .00   | 5.53   |
|      | R5 | 1.0696  | 2.87470  | .58680  | -.1443  | 2.2835  | .00   | 13.14  |
|      | R6 | 1.4354  | 1.94832  | .39770  | .6127   | 2.2581  | .00   | 8.05   |
| STA  | R1 | 65.0717 | 23.26270 | 4.74848 | 55.2487 | 74.8946 | .00   | 98.61  |
|      | R2 | 86.7229 | 24.15964 | 4.93157 | 76.5212 | 96.9246 | .00   | 100.00 |
|      | R3 | 67.3208 | 17.27310 | 3.52586 | 60.0270 | 74.6146 | 26.24 | 100.00 |
|      | R4 | 47.3167 | 22.00996 | 4.49277 | 38.0227 | 56.6107 | .00   | 100.00 |
|      | R5 | 50.6229 | 42.83042 | 8.74272 | 32.5372 | 68.7086 | .00   | 100.00 |
|      | R6 | 40.6663 | 18.49097 | 3.77445 | 32.8582 | 48.4743 | 8.74  | 77.44  |
| Sham |    |         |          |         |         |         |       |        |
| NBA  | R1 | 27.7887 | 20.46795 | 4.26786 | 18.9377 | 36.6397 | .00   | 78.75  |
|      | R2 | 12.9296 | 21.05526 | 4.39032 | 3.8246  | 22.0345 | .00   | 71.42  |
|      | R3 | 26.5209 | 19.28451 | 4.02110 | 18.1816 | 34.8601 | .00   | 73.50  |
|      | R4 | 33.3322 | 22.73136 | 4.73982 | 23.5024 | 43.1619 | 2.85  | 89.54  |
|      | R5 | 8.0065  | 22.16179 | 4.62105 | -1.5770 | 17.5900 | .00   | 81.27  |
|      | R6 | 38.5117 | 25.98322 | 5.41788 | 27.2758 | 49.7477 | 1.91  | 90.38  |
| OA   | R1 | 3.0274  | 2.99688  | .62489  | 1.7314  | 4.3233  | .00   | 10.59  |
|      | R2 | 1.3010  | 2.37498  | .51826  | .2199   | 2.3820  | .00   | 8.62   |
|      | R3 | 1.9552  | 1.75953  | .36689  | 1.1943  | 2.7161  | .00   | 6.67   |
|      | R4 | 1.8113  | 2.12764  | .44364  | .8912   | 2.7314  | .00   | 6.90   |
|      | R5 | 2.0235  | 3.74256  | .78038  | .4051   | 3.6419  | .00   | 12.96  |
|      | R6 | 2.8257  | 5.56278  | 1.15992 | .4201   | 5.2312  | .00   | 27.06  |
| STA  | R1 | 66.6713 | 21.24426 | 4.42973 | 57.4846 | 75.8580 | 20.60 | 100.00 |
|      | R2 | 80.0143 | 29.29796 | 6.39334 | 66.6780 | 93.3506 | .00   | 100.00 |
|      | R3 | 62.5243 | 21.93273 | 4.57329 | 53.0399 | 72.0088 | .00   | 93.35  |
|      | R4 | 59.1565 | 22.98074 | 4.79182 | 49.2189 | 69.0941 | 9.04  | 94.02  |
|      | R5 | 68.0800 | 43.24147 | 9.01647 | 49.3810 | 86.7790 | .00   | 100.00 |
|      | R6 | 56.3052 | 23.75404 | 4.95306 | 46.0332 | 66.5772 | 9.62  | 95.91  |

SD: Standard Deviation; SE: Standard Error; LL: Lower Limit; UP: Upper Limit; Min: Minimum; Max: Maximum;  
NBA: New Bone Area; OA: Osteoid Area; STA: Soft Tissue Area.
